# Supplementary material
Source: Springer Nature journal article supplement (https://www.springermedizin.de/resource/supplementary/12943_2006_163_MOESM10_ESM.pdf/9553580)

CMV

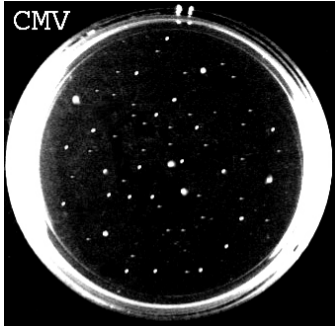

c-Myc

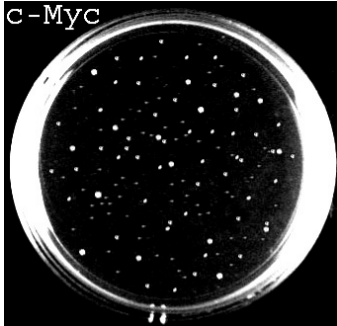

MadMyc

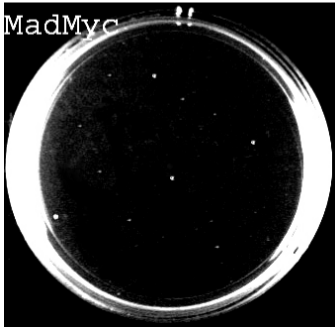

c-Myc+U0126

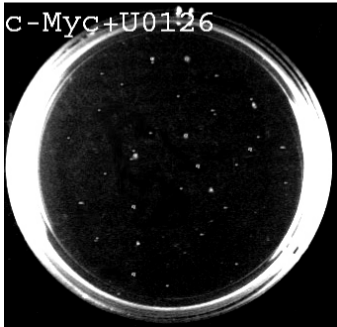

Supplement: MOESM10 [file 9553580]
